# Supplementary material for: Application of a Customised Franz-Type Cell Coupled with HPTLC to Monitor the Timed Release of Bioactive Components in Complex Honey Matrices
Source: MDPI journal article supplement (doi:10.3390/mps6040070), 2023-08-03
Supplement: s1 [file s1]

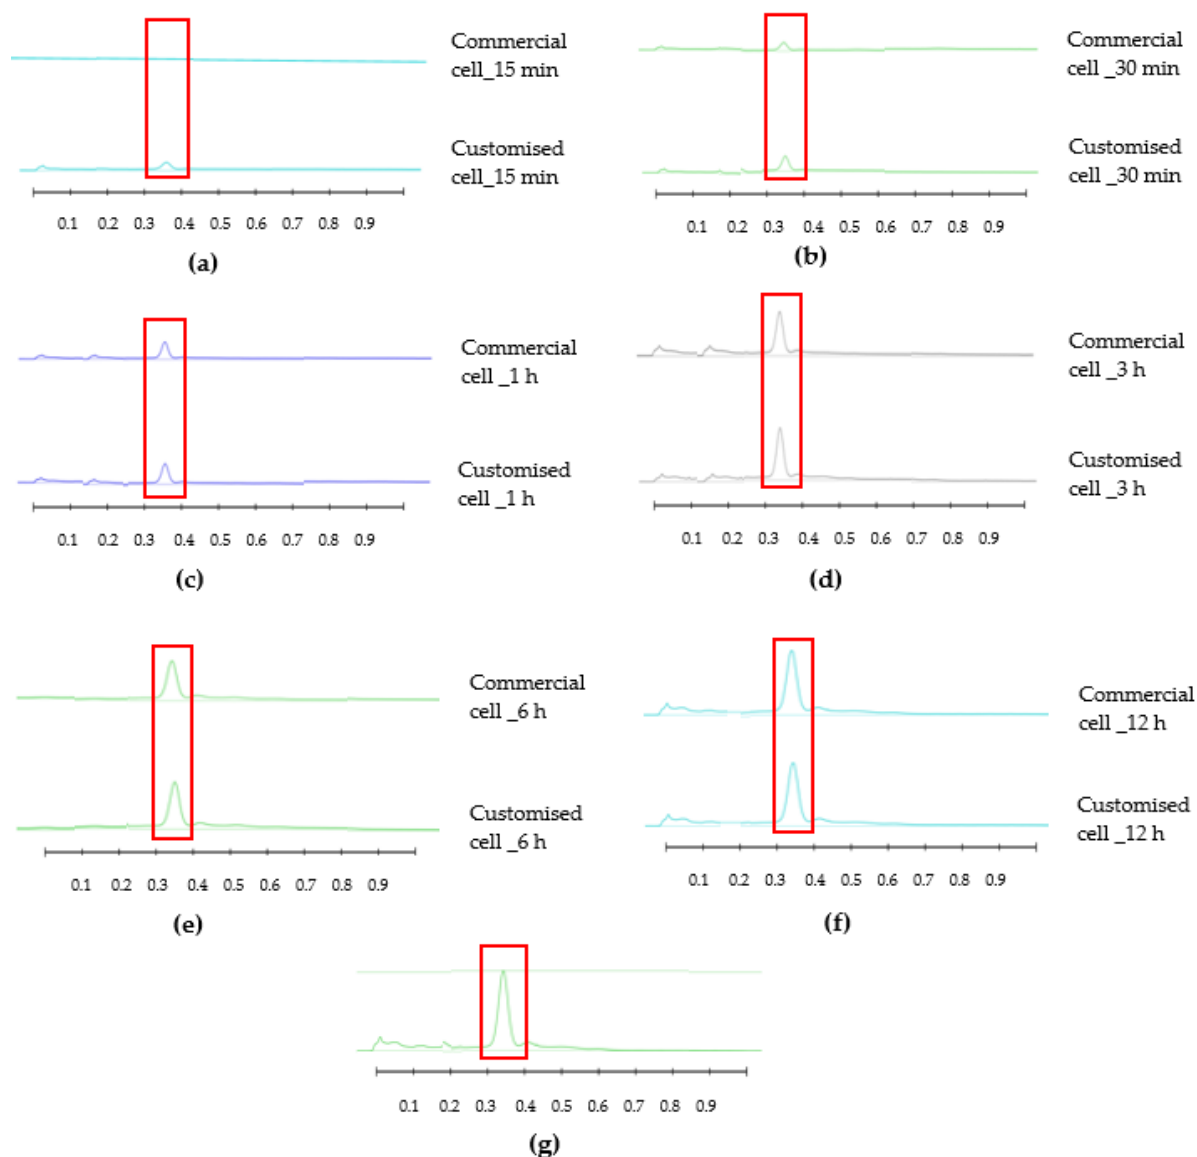

**Figure S1.** Peak profile of compounds of interest (R<sub>f</sub> 0.38) released from pure WA Manuka honey 1 honey using Franz cell and customised Franz-type cell set-up at (a) 15 min, (b) 30 min, (c) 1 h, (d) 3 h, (e) 6 h, (f) 12 h and (g) baseline (0 min). Red box highlights monitored band.

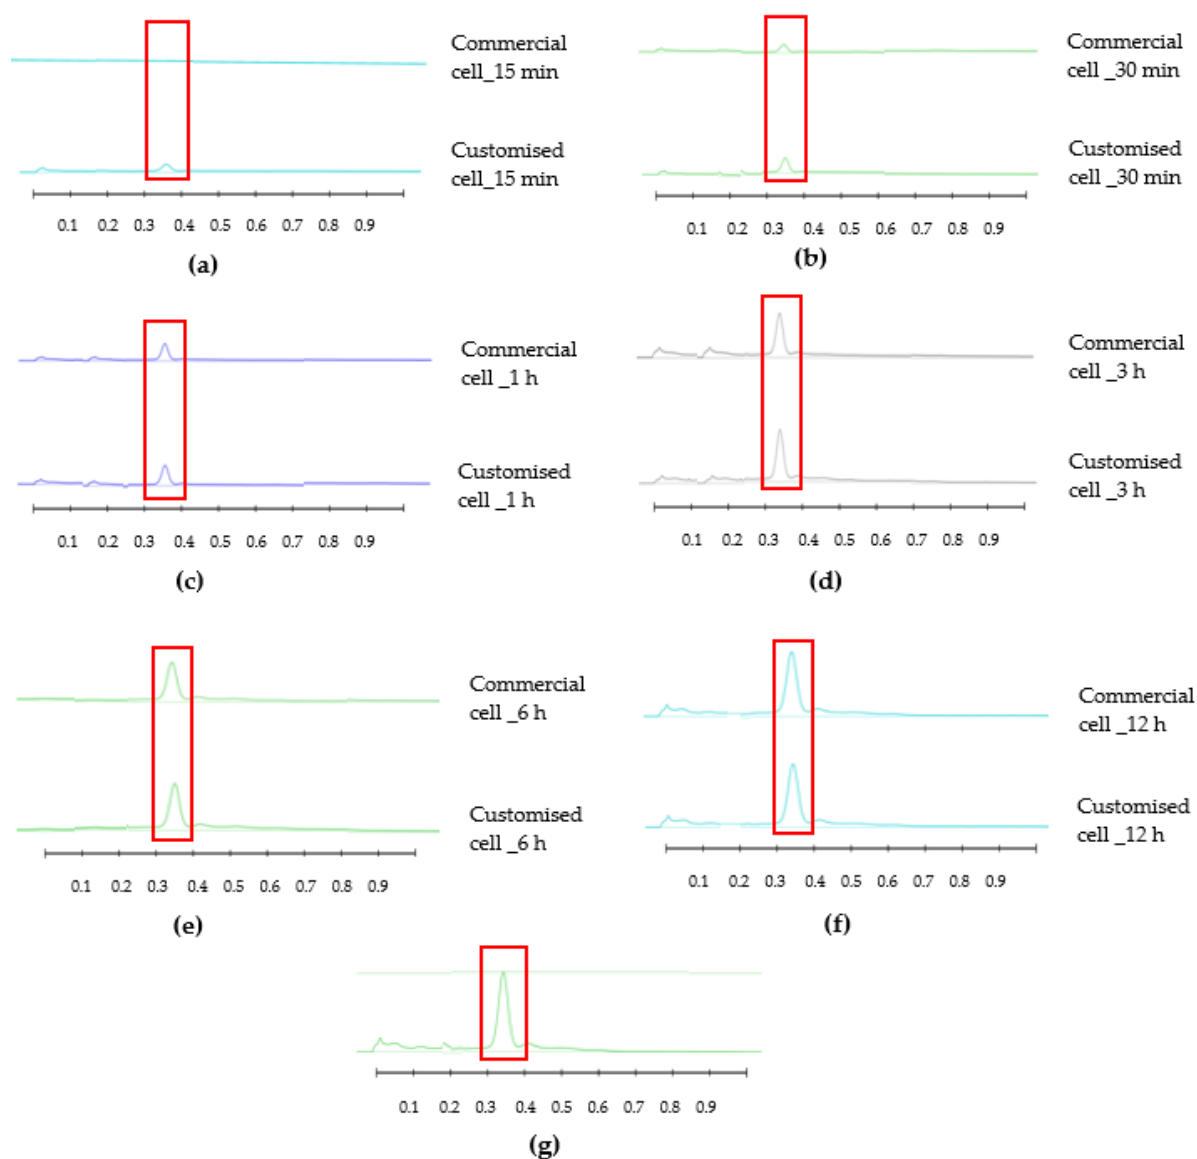

**Figure S2.** Peak profile of compounds of interest ( $R_f$  0.38) released from WA Manuka honey 1 pre-gel solution using Franz cell and customised Franz-type cell set-up at (a) 15 min, (b) 30 min, (c) 1 h, (d) 3 h, (e) 6 h, (f) 12 h and (g) baseline (0 min). Red box highlights monitored band.

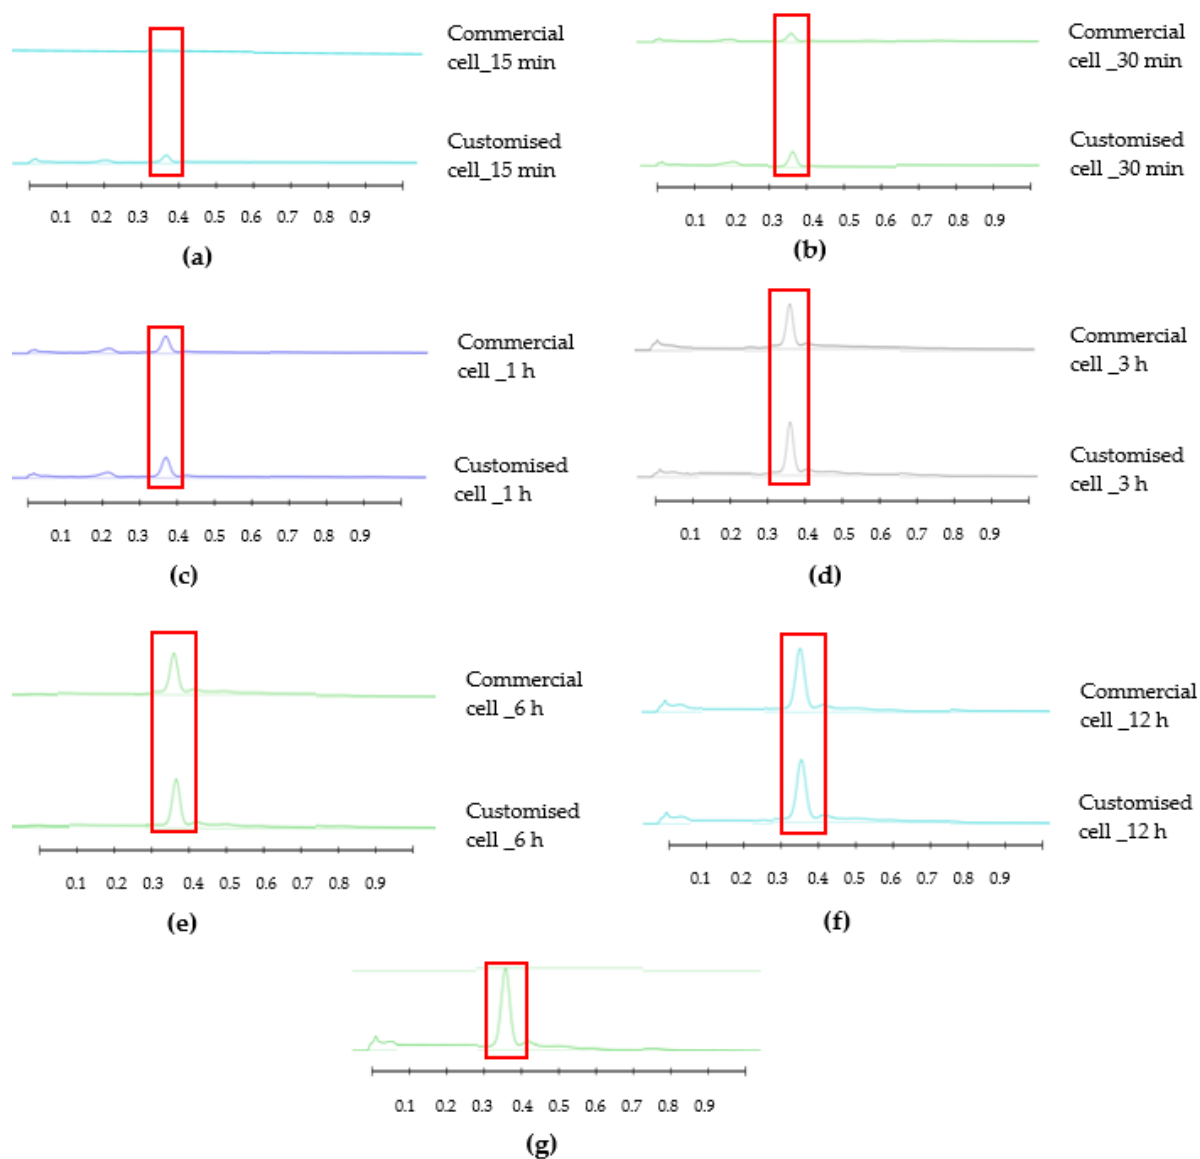

**Figure S3.** Peak profile of compounds of interest ( $R_f$  0.38) released from pure WA Manuka honey 2 honey using Franz cell and customised Franz-type cell set-up at (a) 15 min, (b) 30 min, (c) 1 h, (d) 3 h, (e) 6 h, (f) 12 h and (g) baseline (0 min). Red box highlights monitored band.

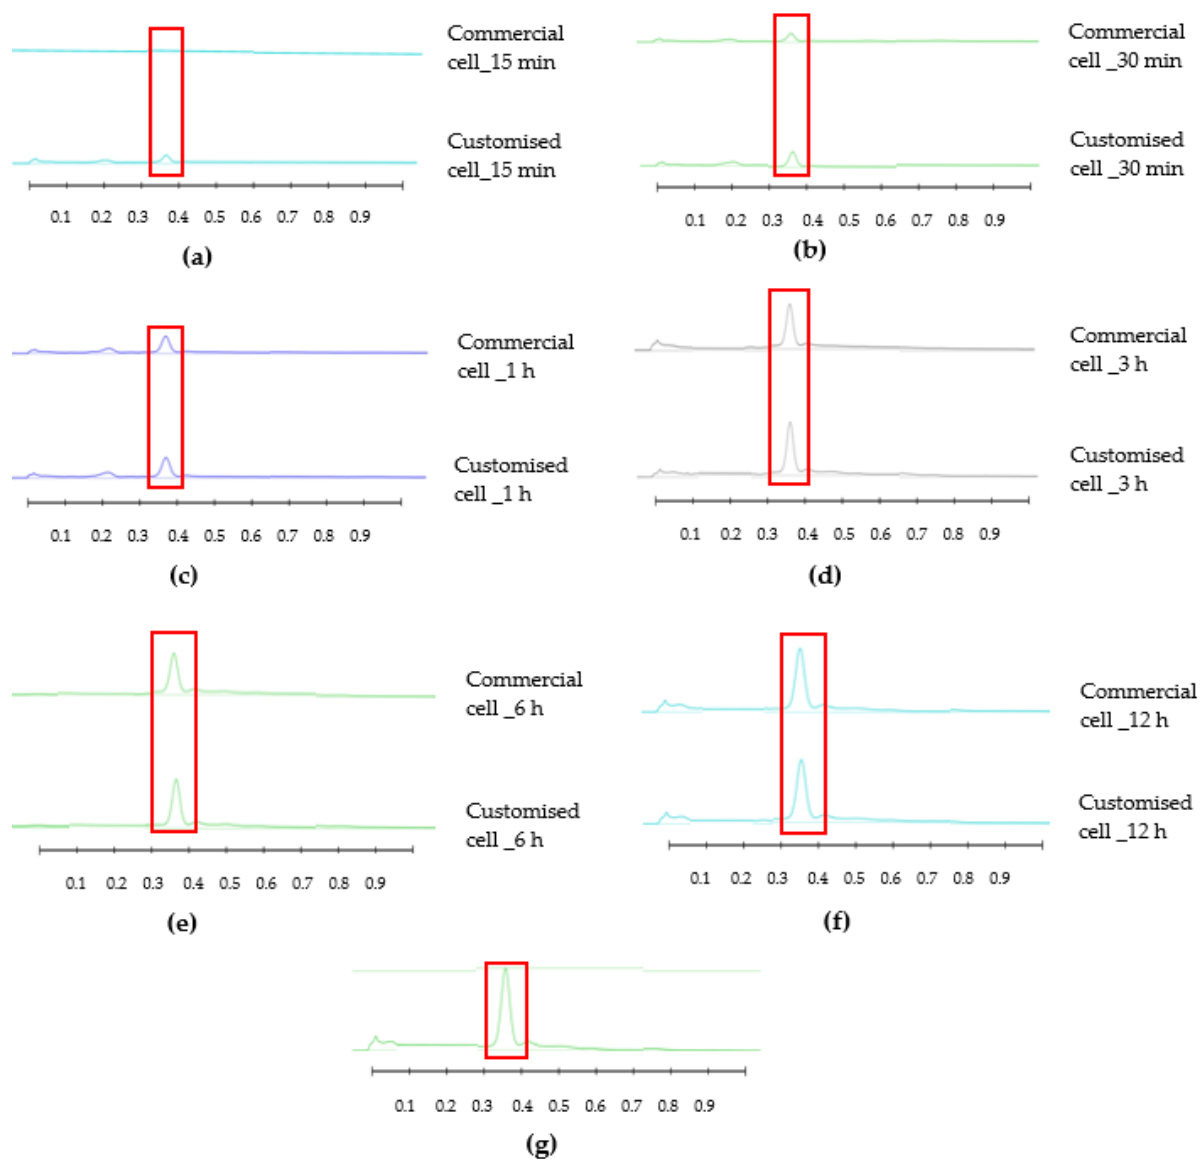

**Figure S4.** Peak profile of compounds of interest ( $R_f$  0.38) released from WA Manuka honey 2 pre-gel solution using Franz cell and customised Franz-type cell set-up at (a) 15 min, (b) 30 min, (c) 1 h, (d) 3 h, (e) 6 h, (f) 12 h and (g) baseline (0 min). Red box highlights monitored band.

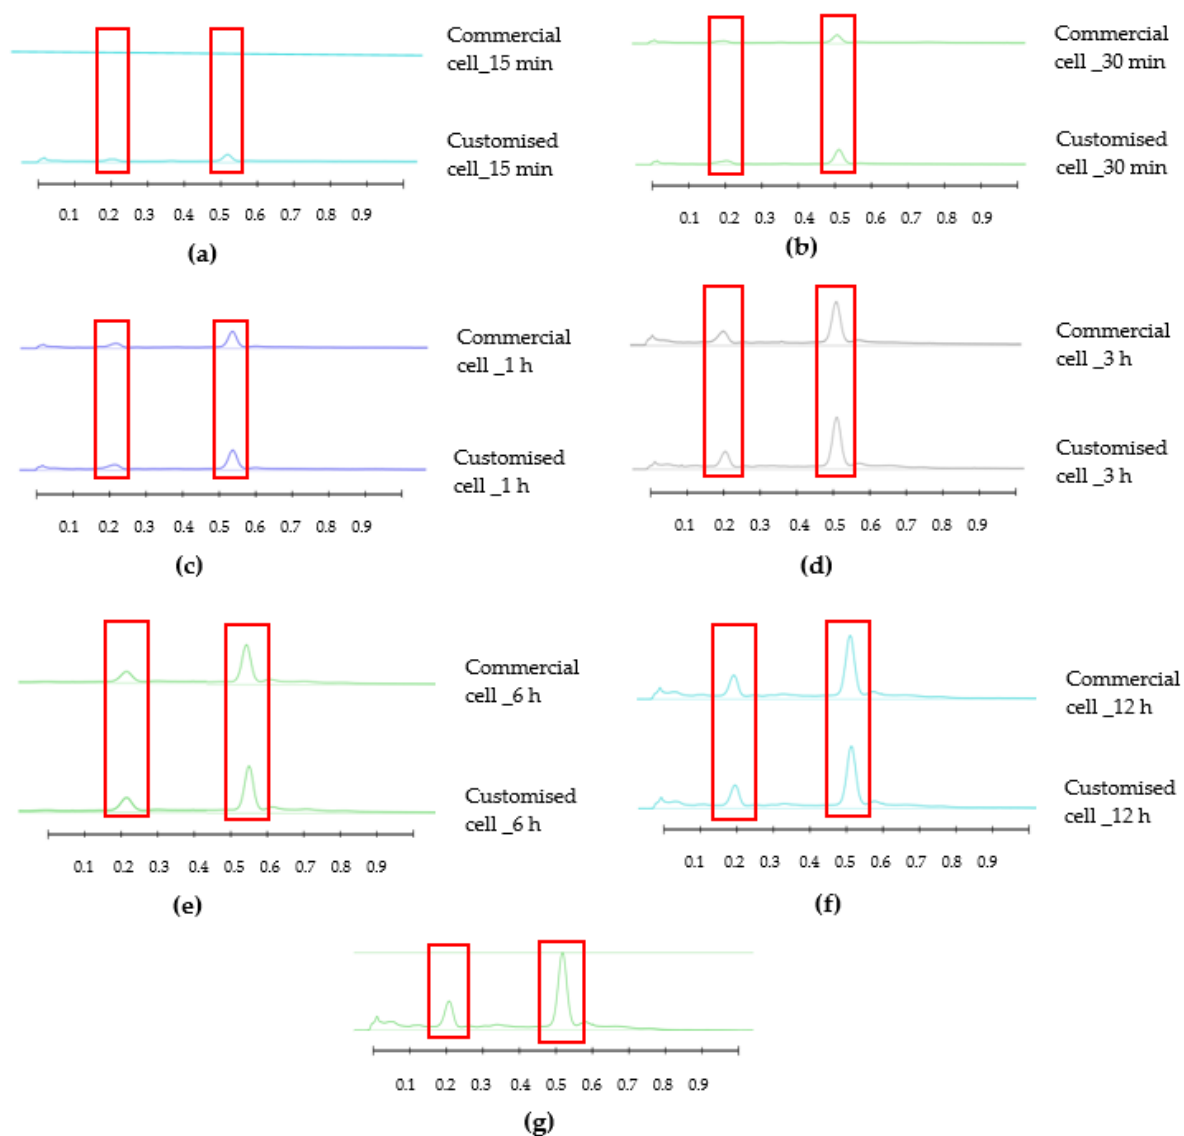

**Figure S5.** Peak profile of compounds of interest (R<sub>f</sub> 0.20 and R<sub>f</sub> 0.53) released from pure Coastal Peppermint honey using Franz cell and customised Franz-type cell set-up at (a) 15 min, (b) 30 min, (c) 1 h, (d) 3 h, (e) 6 h, (f) 12 h and (g) baseline (0 min). Red boxes highlight monitored bands.

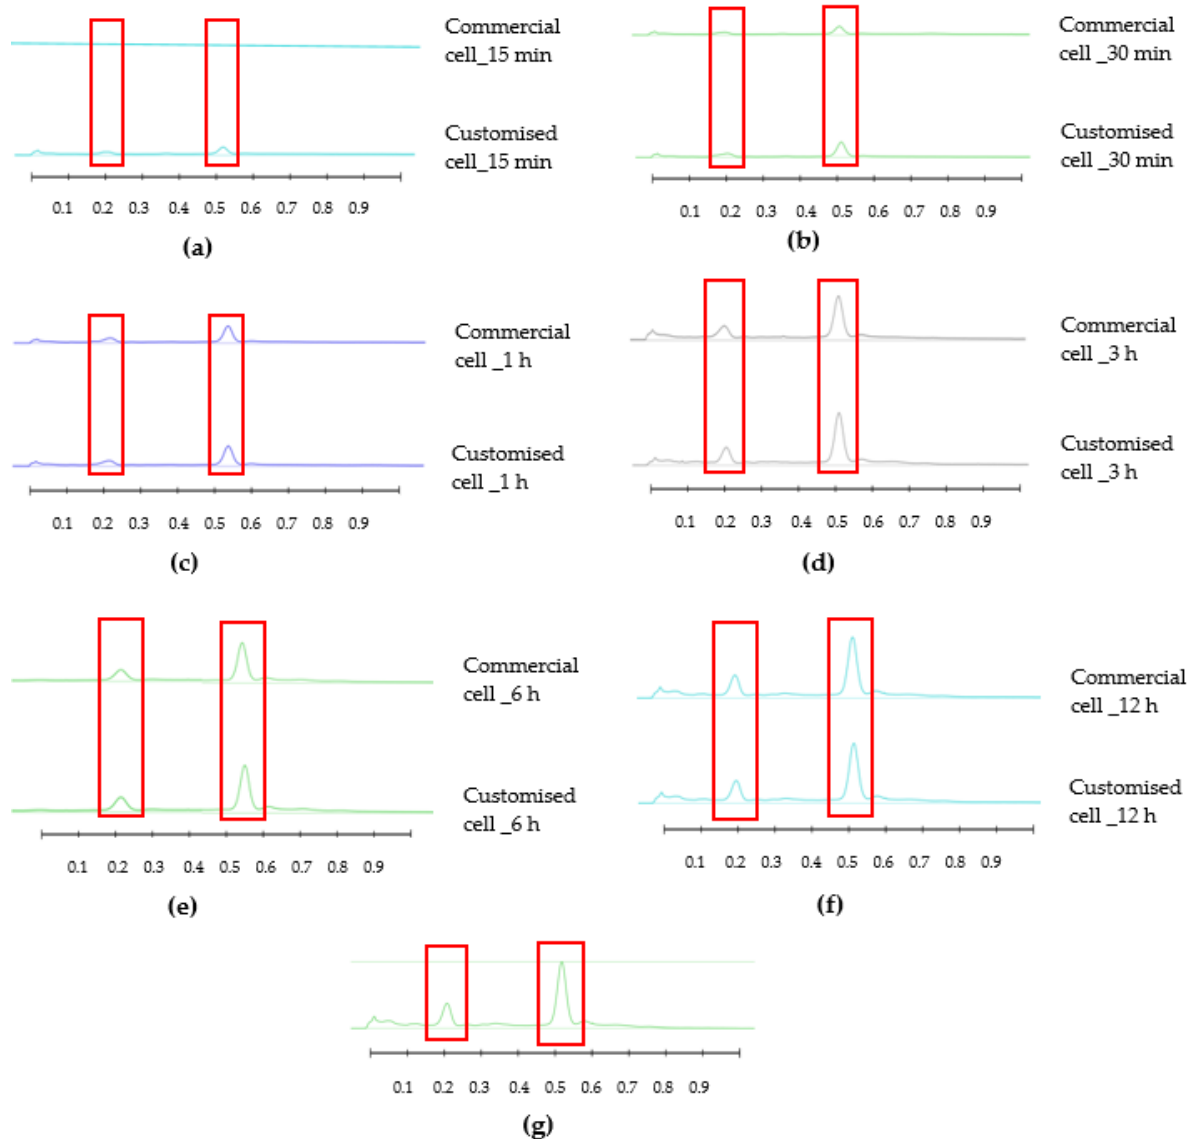

**Figure S6.** Peak profile of compounds of interest (R<sub>f</sub> 0.20 and R<sub>f</sub> 0.53) released from Coastal Peppermint honey pre-gel solution using Franz cell and customised Franz-type cell set-up at (a) 15 min, (b) 30 min, (c) 1 h, (d) 3 h, (e) 6 h, (f) 12 h and (g) baseline (0 min). Red boxes highlight monitored bands.

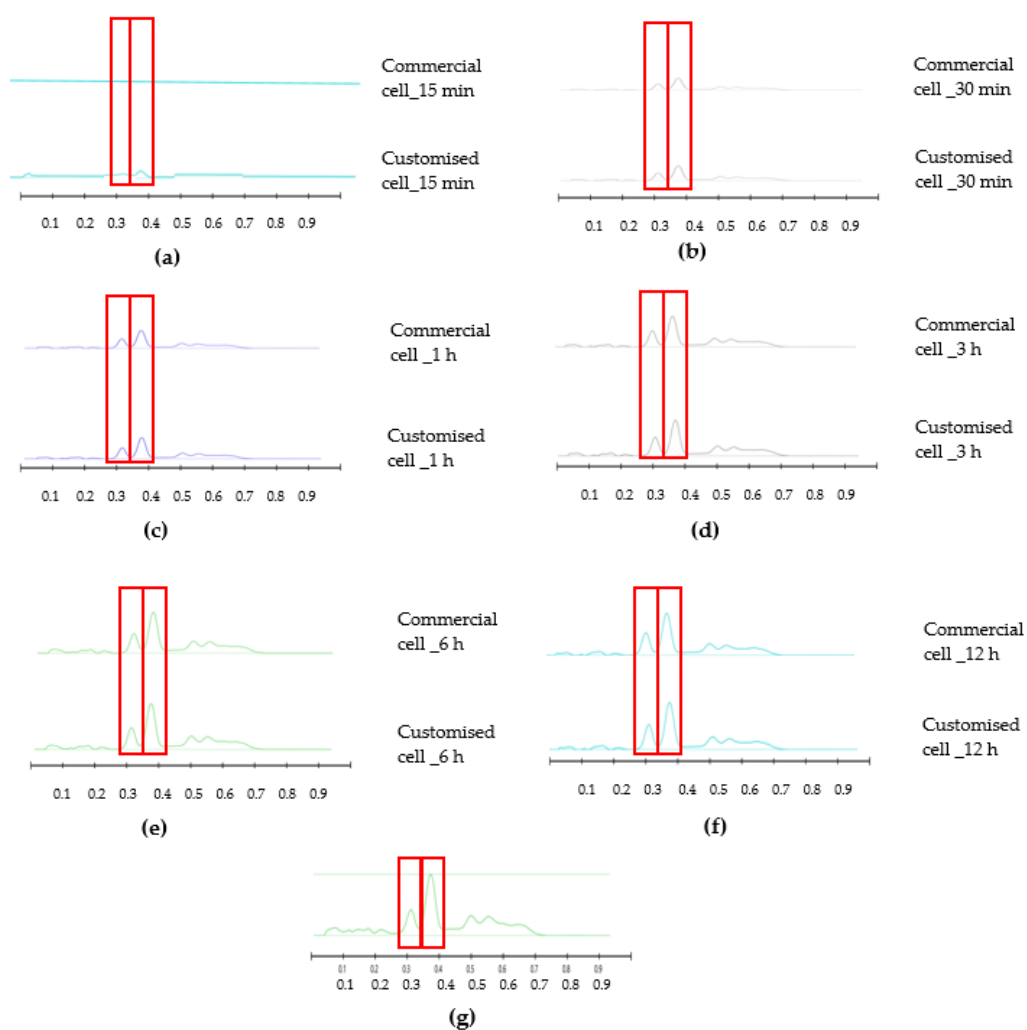

**Figure S7.** Peak profile of compounds of interest ( $R_f$  0.32 and  $R_f$  0.39) released from pure NZ Manuka honey using Franz cell and customised Franz-type cell set-up at (a) 15 min, (b) 30 min, (c) 1 h, (d) 3 h, (e) 6 h, (f) 12 h and (g) baseline (0 min). Red boxes highlight monitored bands.

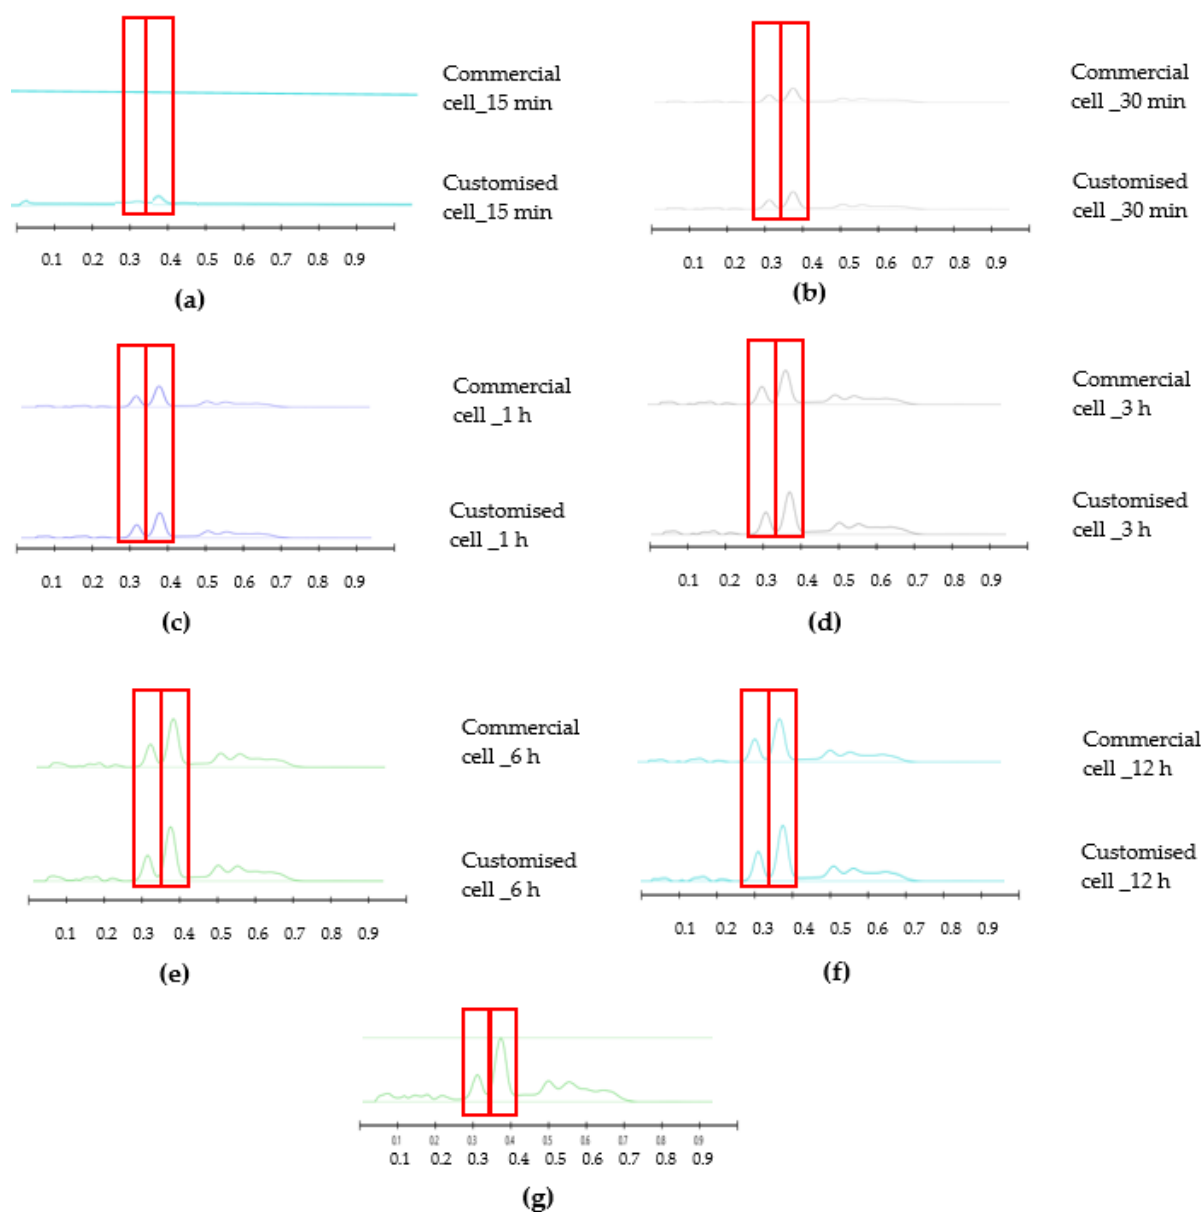

**Figure S8.** Peak profile of compounds of interest ( $R_f$  0.32 and  $R_f$  0.39) released from NZ Manuka honey pre-gel solution using Franz cell and customised Franz-type cell set-up at (a) 15 min, (b) 30 min, (c) 1 h, (d) 3 h, (e) 6 h, (f) 12 h and (g) baseline (0 min). Red boxes highlight monitored bands.
